# Supplementary material
Source: publisher site journal article supplement (https://www.spandidos-publications.com/7614/downloadSupplementary)

Figure S1. Workflow of the present study. ssGSEA, single-sample gene set enrichment analysis; TARGET, Therapeutically Applicable Research to Generate Effective Treatments; lncRNA, long non-coding RNA; DEL, differentially expressed lncRNA; ICI, immune checkpoint inhibitor.

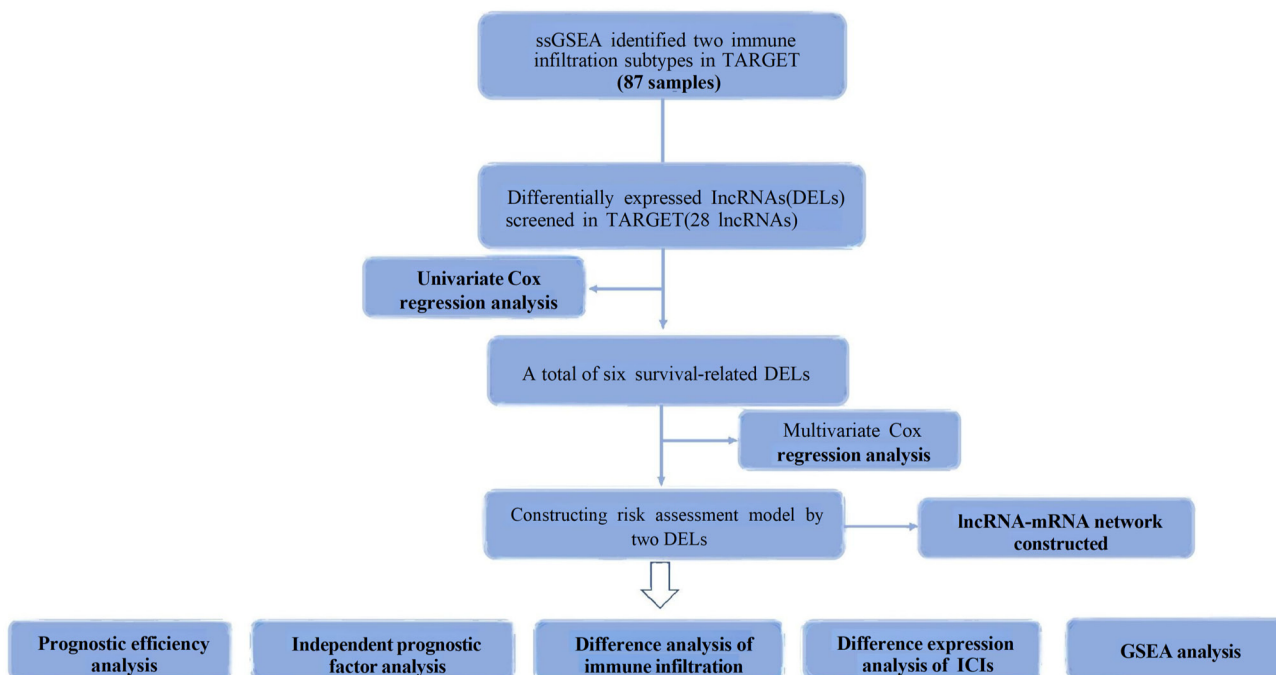

Supplement: Supplementary file 1 [file downloadSupplementary]
